# Supplementary material
Source: PubMed Central journal article supplement (PMC3079504)
Supplement: NIHMS264938-supplement-1_si_001.pdf [file NIHMS264938-supplement-1_si_001.pdf]

## SUPPORTING INFORMATION

### Transition State Analysis of the Arsenolytic Depyrimidination of Thymidine by Human Thymidine Phosphorylase

Phillip A. Schwartz, Mathew J. Veticatt, and Vern L. Schramm\*

*Department of Biochemistry, Albert Einstein College of Medicine, Bronx,*

*New York 10461, USA*

[vern@aecom.yu.edu](mailto:vern@aecom.yu.edu)

#### Table of Contents

|                                                                                                                                 |    |
|---------------------------------------------------------------------------------------------------------------------------------|----|
| 1. Experimental Section .....                                                                                                   | 2  |
| A. Kinetic of hTP Arsenolysis .....                                                                                             | 2  |
| 2. Theoretical Section .....                                                                                                    | 3  |
| A. Methodology .....                                                                                                            | 3  |
| 3. Coordinates of calculated structures .....                                                                                   | 6  |
| A. Starting Material.....                                                                                                       | 6  |
| Thymidine 2'-endo B3LYP/6-31G* .....                                                                                            | 6  |
| Thymidine 3'-endo B3LYP/6-31G* .....                                                                                            | 6  |
| B. Transition structures discussed in manuscript .....                                                                          | 6  |
| A <sub>N</sub> D <sub>N</sub> mechanism – Best fit transition state geometry .....                                              | 6  |
| D <sub>N</sub> <sup>‡</sup> A <sub>N</sub> mechanism – transition structures with and without histidine mimic .....             | 7  |
| LG 2.3 with Histidine B3LYP/6-31G* .....                                                                                        | 7  |
| LG 2.4 with Histidine B3LYP/6-31G* .....                                                                                        | 7  |
| LG 2.5 with Histidine B3LYP/6-31G* .....                                                                                        | 8  |
| LG 2.6 with Histidine B3LYP/6-31G* .....                                                                                        | 8  |
| LG 2.7 with Histidine B3LYP/6-31G* .....                                                                                        | 9  |
| LG 2.2 without Histidine B3LYP/6-31G* .....                                                                                     | 9  |
| LG 2.3 without Histidine B3LYP/6-31G* .....                                                                                     | 10 |
| LG 2.4 without Histidine B3LYP/6-31G* .....                                                                                     | 10 |
| LG 2.5 without Histidine B3LYP/6-31G* .....                                                                                     | 10 |
| LG 2.6 without Histidine B3LYP/6-31G* .....                                                                                     | 10 |
| D <sub>N</sub> <sup>‡</sup> A <sub>N</sub> <sup>‡</sup> mechanism– transition structures with and without histidine mimic ..... | 11 |
| Nuc 2.2 with Histidine B3LYP/6-31G* .....                                                                                       | 11 |
| Nuc 2.3 with Histidine B3LYP/6-31G* .....                                                                                       | 11 |
| Nuc 2.4 with Histidine B3LYP/6-31G* .....                                                                                       | 11 |
| Nuc 2.5 with Histidine B3LYP/6-31G* .....                                                                                       | 12 |
| Nuc 2.6 with Histidine B3LYP/6-31G* .....                                                                                       | 12 |
| Nuc 2.7 with Histidine B3LYP/6-31G* .....                                                                                       | 13 |
| Nuc 2.2 without Histidine B3LYP/6-31G* .....                                                                                    | 13 |
| Nuc 2.3 without Histidine B3LYP/6-31G* .....                                                                                    | 13 |
| Nuc 2.4 without Histidine B3LYP/6-31G* .....                                                                                    | 14 |
| Nuc 2.5 without Histidine B3LYP/6-31G* .....                                                                                    | 14 |
| Nuc 2.6 without Histidine B3LYP/6-31G* .....                                                                                    | 14 |
| Nuc 2.7 without Histidine B3LYP/6-31G* .....                                                                                    | 15 |

## 1. Experimental Section

### A. Kinetic of hTP Arsenolysis

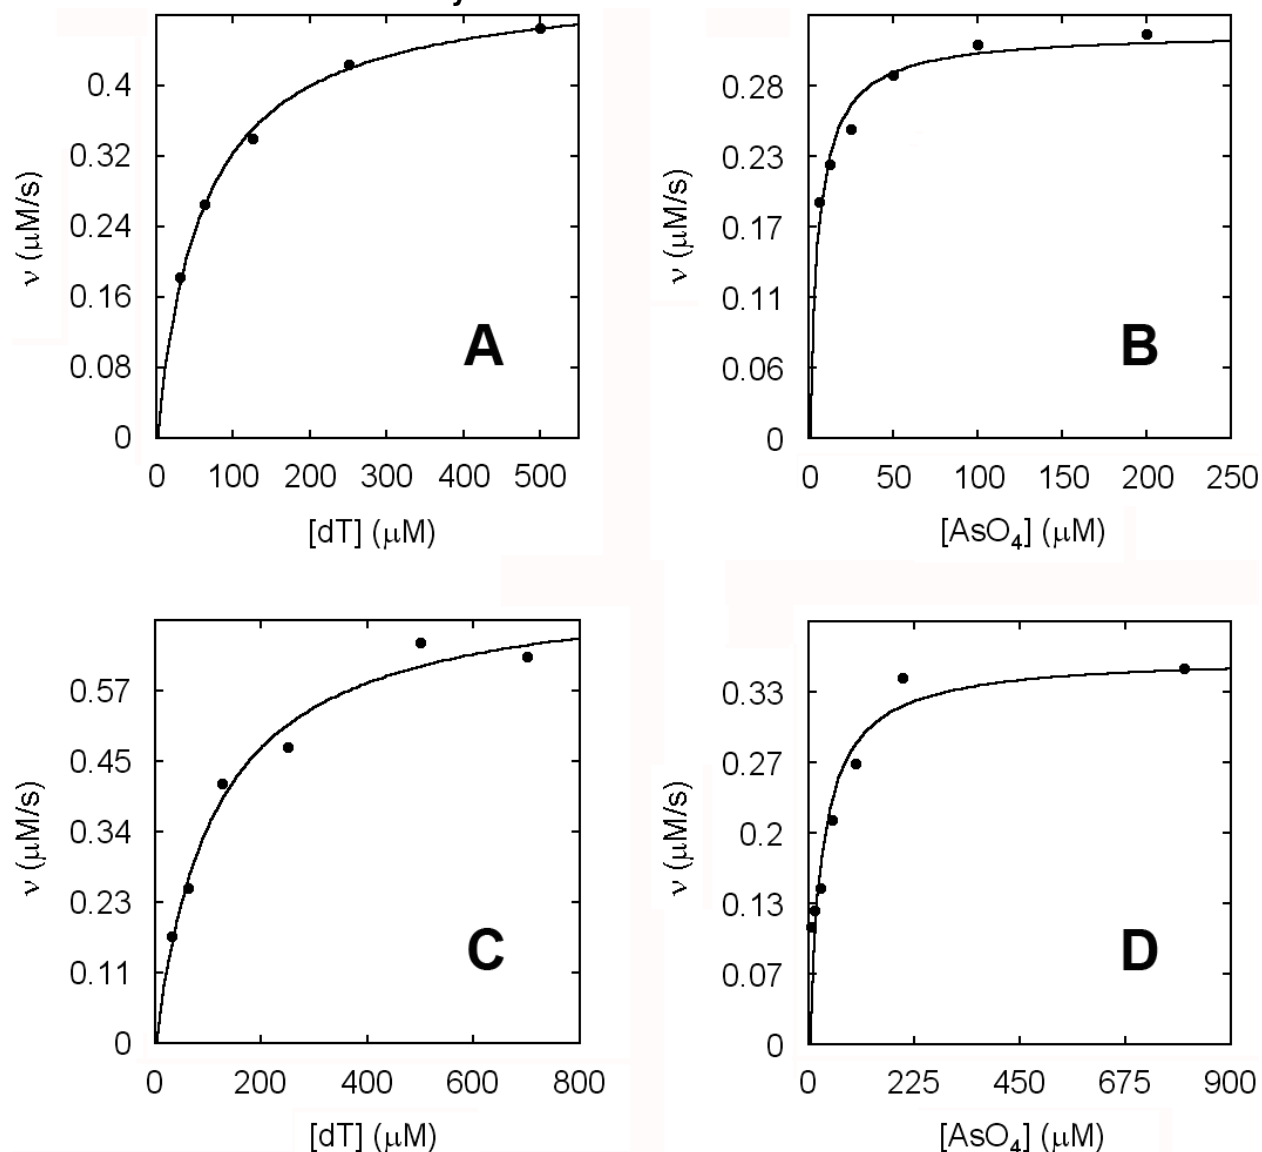

**Figure S1.** Kinetics of hTP arsenolysis. A model SX-20 stopped-flow spectrometer (Applied Photophysics) outfitted with a mercury-xenon lamp was used to follow the arsenolytic depyrimidation of dT by hTP. In the reaction chamber, 20 mM HEPES pH 7.4, 1 mM DTT, and varying concentrations of dT or sodium arsenate under saturating concentrations of the second substrate were monitored for hTP-catalyzed arsenolysis. The reaction progress was monitored by the decrease in absorbance of dT upon depyrimidation at 290 nm using an extinction coefficient of  $\Delta\epsilon_{290} = 1000 \text{ M}^{-1} \text{ cm}^{-1}$ . hTP concentration was maintained at 175 nM (22 °C) or 90 nM (37 °C) in the assay. A) 22 °C, vary dT at 2.5 mM sodium arsenate. B) 22 °C, vary sodium arsenate at 0.5 mM dT. C) 37 °C, vary dT at 2.5 mM sodium arsenate. D) 37 °C, vary sodium arsenate at 0.5 mM dT. Apparent  $K_M$ s and  $k_{\text{cat}}$  were obtained by fitting data to the Michaelis-Menten equation.

## 2. Theoretical Section

### A. Methodology

A preliminary data set for the analysis of the key isotope effects was generated using a simple model system. The 3'- and 5'- hydroxyl groups were substituted by hydrogen atoms. This was done in order to eliminate calculational artifacts that may arise from interactions between these groups with the nucleophile and/or the leaving group (that might not be representative of catalysis). As discussed in the manuscript, a previous theoretical study on a structurally related enzyme (TP from *E.coli*) proposes a key role for an active site histidine – activation of phosphate and stabilization of thymine anion by hydrogen bonding. Mutation of the analogous residue in hTP makes it catalytically inactive. It was therefore deemed important to include a truncated mimic of this active site residue in our theoretical model in order to better understand the mechanism of catalysis. Therefore, our preliminary model for predicting KIEs for the  $A_ND_N$  mechanism consisted of a modified thymidine, arsenate and a histidine mimic (Scheme S1).

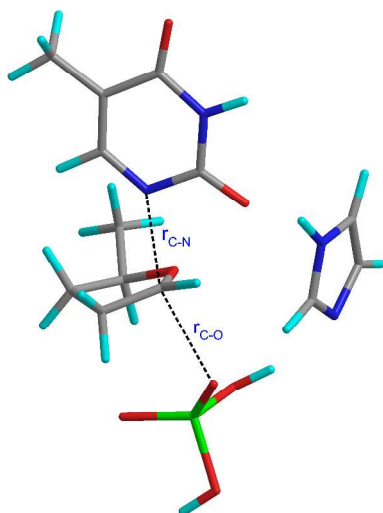

**Scheme S1.** Preliminary model for the prediction of KIEs

Restraining only the distances along the reaction coordinate, a potential energy surface was generated as follows. The breaking C-N bond distance ( $r_{C-N}$ ) was fixed at 1.7 Å and the forming C-O bond distance ( $r_{C-O}$ ) was systematically varied between 2.9 and 1.8 Å (at increments of 0.1 Å). Each geometry

was optimized and a frequency calculation was performed to get the imaginary frequency corresponding to motion along the reaction coordinate. Thirteen such grids of optimized geometries were calculated by varying  $r_{C-N}$  between 1.7 and 3.0 (at increments of 0.1 Å) and their energies ( $E + zpe$ ) were plotted to generate a potential energy surface. The area of the surface indicated in yellow is the chemical saddle point, the transition state of the model system. Isotope effect predictions were made for each of the 143 geometries versus the lowest energy conformation of dT.

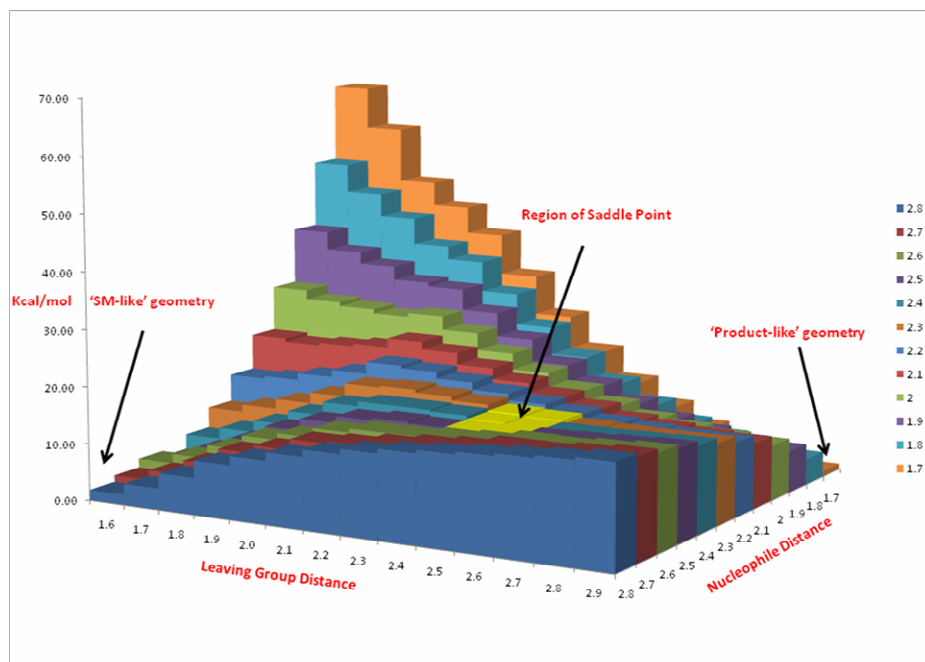

**Figure S2.** Computed potential energy surface for the preliminary model

It was found that the best match of the key isotope effects ( $1'-^{14}\text{C}$ ,  $1'-^3\text{H}$  and  $1'-^{15}\text{N}$ ) were found in the range of  $r_{(C-N)} = 2.5 - 2.9 \text{ \AA}$  and  $r_{(C-N)} = 2.9 - 2.5 \text{ \AA}$  for combinations where the sum of the two distances was  $5.4 \text{ \AA}$ . These geometries correspond to a dissociative transition state with significant oxocarbenium ion character. At this point, the 3'- and 5'- hydroxyl groups were incorporated into the model and these five selected geometries were re-optimized to arrive at the 'most likely' geometry of the transition state structure based on the match with experimental KIEs. The orientation of the arsenate and the leaving group with respect to the 2-deoxyribose ring were tactfully manipulated to locate several minima for each of these geometries. The final transition state that was selected as the best fit model for the experimental KIEs had one imaginary frequency of -76. Apart from the two distances along the

reaction coordinate, the orientation of the nucleophile (arsenate) with respect to the ribose ring was fixed at a dihedral angle of  $150^\circ$  defined by As-O-C1-C2.

### 3. Coordinates of calculated structures

#### A. Starting Material

##### Thymidine 2'-endo B3LYP/6-31G\*

thymidine-2endo-SM-B3G

E(RB+HF-LYP) = -875.130069089

```

Zero-point correction=          0.251363
(Hartree/Particle)
Thermal correction to Energy=    0.266935
Thermal correction to Enthalpy=   0.267880
Thermal correction to Gibbs Free Energy= 0.208537
Sum of electronic and zero-point Energies= -
874.878707
Sum of electronic and thermal Energies= -
874.863134
Sum of electronic and thermal Enthalpies= -
874.862189
Sum of electronic and thermal Free Energies= -
874.921533

```

|       | E (Thermal)<br>KCal/Mol | CV<br>Cal/Mol-Kelvin | S<br>Cal/Mol-Kelvin |
|-------|-------------------------|----------------------|---------------------|
| Total | 167.505                 | 59.637               | 124.898             |

```

C,0,-2.3087824787,1.0680309401,0.4341890204
C,0,-2.7690109005,1.0201974824,-1.028408447
O,0,-3.1831594353,-0.3105740132,-1.270399439
C,0,-2.5775933909,-1.2018626884,-0.306352973
C,0,-1.6782642293,-0.3136807011,0.5875824656
C,0,-3.6700457079,-1.9615715921,0.4468748051
O,0,-0.3479274121,-0.2151639228,0.0732394212
N,0,-3.8436820278,1.9477075948,-1.4187283268
C,0,-3.6295628498,2.8061924472,-2.489836286
C,0,-4.5402905676,3.679553083,-2.9731709917
C,0,-5.8593054942,3.7202589022,-2.3444238061
N,0,-6.0044086168,2.8032053631,-1.2868183547
C,0,-5.0854974151,1.9019569687,-0.7873235749
O,0,-5.3706073527,1.1539549858,0.1412596974
O,0,-6.7837015449,4.4506049909,-2.6648194
C,0,-4.2795317853,4.605289209,-4.1260252102
H,0,-4.351089761,-2.4093013176,-0.2947884998
H,0,-6.9102283451,2.7845383912,-0.8307550068
H,0,-2.6397458307,2.7294839827,-2.9267946773
H,0,-1.9269699436,1.2724288016,-1.6844087689
H,0,-1.5854579996,1.8656232463,0.6201522007
H,0,-3.1610952803,1.1668846901,1.1053696747
H,0,-1.9593932173,-1.9219763765,-0.86316077
H,0,-1.6780525787,-0.657567803,1.6289076594
H,0,-3.2655020574,4.478287454,-4.5170898641
H,0,-4.9927270844,4.4255872681,-4.9383738969
H,0,-4.4088981201,5.6503381335,-3.8224341423
H,0,-3.2026325393,-2.7847495092,1.0023392442
O,0,-4.3570791201,-1.1740519124,1.3935585969
H,0,0.0520716119,-1.0983423643,0.1019408426
H,0,-4.821115525,-0.4609619594,0.9122888087

```

##### Thymidine 3'-endo B3LYP/6-31G\*

thymidine-3endo-SM-B3G

E(RB+HF-LYP) = -875.127071401

```

Zero-point correction=          0.250918
(Hartree/Particle)
Thermal correction to Energy=    0.266812
Thermal correction to Enthalpy=   0.267756
Thermal correction to Gibbs Free Energy= 0.207519
Sum of electronic and zero-point Energies= -
874.876153
Sum of electronic and thermal Energies= -
874.860260
Sum of electronic and thermal Enthalpies= -
874.859315
Sum of electronic and thermal Free Energies= -
874.919552

```

|       | E (Thermal)<br>KCal/Mol | CV<br>Cal/Mol-Kelvin | S<br>Cal/Mol-Kelvin |
|-------|-------------------------|----------------------|---------------------|
| Total | 167.427                 | 60.177               | 126.779             |

```

C,0,-2.8607088612,0.0456624814,-0.5413475501
C,0,-1.4015274633,-0.1274561287,-1.0173979224
O,0,-1.0568919881,1.0090442759,-1.7753042001
C,0,-2.2196704256,1.8220372943,-2.0382506733
C,0,-3.2399073339,1.4773521689,-0.9326543665
N,0,-0.3975972774,-0.3250511185,0.0518738696
C,0,0.3879486927,-1.4678160481,0.0547795007
C,0,1.3472305722,-1.737481971,0.9684635759
C,0,1.5936628781,-0.7547844516,2.0230146909
N,0,0.7727159202,0.3861336369,1.9324361257
C,0,-0.2073282448,0.6716198597,1.0039347983
O,0,-0.8532074785,1.7140641458,1.0400381889
O,0,2.419576198,-0.855811109,2.916322898
C,0,2.1820358107,-2.9854168983,0.9601150355
C,0,-1.7750398221,3.2816006868,-2.089786935
O,0,-4.5847016129,1.5119579229,-1.3982971405
H,0,-0.9056102716,3.3506007985,-2.7637650587
H,0,0.9202294811,1.1020309679,2.6358154525
H,0,0.1711302988,-2.1597446685,-0.7525185414
H,0,-3.510407748,-0.6453333927,-1.0887171175
H,0,-2.9771366418,-0.1514701788,0.52598197
H,0,-2.6484868569,1.5329913699,-3.0100121182
H,0,-3.0997956642,2.1556060161,-0.0884242304
H,0,1.9100086192,-3.6406408412,0.1270182315
H,0,3.2471386423,-2.7408236519,0.8789475522
H,0,2.0598291563,-3.541205479,1.8966826439
H,0,-2.5805192656,3.8783975599,-2.5363104626
O,0,-1.5059470058,3.8443075917,-0.822719324
H,0,-1.0144915511,3.1878702754,-0.2940100037
H,0,-1.3045682137,-1.0263609261,-1.6379873332
H,0,-4.9039975431,2.4222718113,-1.308434556

```

#### B. Transition structures discussed in manuscript

##### A<sub>N</sub>D<sub>N</sub> mechanism – Best fit transition state geometry

dis295245-AsO4-di-150-fixed  
E(RB3LYP) = -3637.27624035

```

Zero-point correction=          0.355545
(Hartree/Particle)

```

Thermal correction to Energy= 0.384602  
 Thermal correction to Enthalpy= 0.385546  
 Thermal correction to Gibbs Free Energy= 0.291293  
 Sum of electronic and zero-point Energies= -  
 3636.920696  
 Sum of electronic and thermal Energies= -  
 3636.891639  
 Sum of electronic and thermal Enthalpies= -  
 3636.890695  
 Sum of electronic and thermal Free Energies= -  
 3636.984947

|       | E (Thermal) | CV             | S              |
|-------|-------------|----------------|----------------|
|       | KCal/Mol    | Cal/Mol-Kelvin | Cal/Mol-Kelvin |
| Total | 241.341     | 103.655        | 198.372        |

C,0,-0.6800095824,0.2162556531,-2.1357349488  
 C,0,-0.2919604169,0.4540946622,-0.7207185808  
 O,0,0.7022052076,1.2507416393,-0.5878775948  
 C,0,1.2811250304,1.6356752806,-1.9028374415  
 C,0,0.5163689215,0.7781383773,-2.9561921413  
 C,0,1.1255072727,3.1291077237,-2.0896529066  
 O,0,1.828326383,3.8088370309,-1.0633908904  
 O,0,1.2931058762,-0.1989751463,-3.5674441842  
 N,0,-2.3178263731,1.5391823874,0.1272749386  
 C,0,-2.733825965,2.8221719921,0.2479080775  
 C,0,-3.8050277844,3.2733151731,0.9780820661  
 C,0,-4.5738939327,2.2919823115,1.7149478192  
 N,0,-4.0810239059,0.98492758,1.5717805188  
 C,0,-2.9818302829,0.5762635888,0.8172030014  
 O,0,-2.6647720919,-0.6328860714,0.8015548527  
 O,0,-5.5650484806,2.5127082608,2.4163107494  
 C,0,-4.2221718139,4.7141133421,1.0572399352  
 N,0,-1.0341810791,-2.8282145748,1.7216928082  
 C,0,-0.7480156386,-3.4101639146,2.9387368944  
 C,0,0.4184395655,-4.1085705745,2.7470032536  
 N,0,0.8576850414,-3.9610970962,1.4481728829  
 C,0,-0.0418761744,-3.1829970076,0.8657556957  
 H,0,-4.2129081687,5.0791236869,2.0926114612  
 H,0,-5.2475091545,4.8582973922,0.6915440089  
 H,0,-2.1358060599,3.5463430723,-0.3105990255  
 H,0,-4.5762257935,0.2606876563,2.0784918493  
 H,0,-1.7571747565,-2.1344531462,1.5170733759  
 H,0,2.5519089262,0.0007350053,1.2014838208  
 H,0,-3.5545078682,5.35029003,0.4641316045  
 H,0,2.3292424856,1.3309250249,-1.8155928808  
 H,0,1.525598711,3.370750028,-3.0885273198  
 H,0,0.0527408795,3.3868558027,-2.088978742  
 H,0,0.147829186,1.4341639066,-3.7552884429  
 H,0,-1.622538168,0.7337335158,-2.3328388038  
 H,0,-0.8217341843,-0.8508398621,-2.3187796231  
 H,0,1.5063948766,-0.8847351964,-2.8600715764  
 H,0,1.628716603,4.7534317845,-1.1421595449  
 O,0,1.423985957,-1.8217134785,-1.480240988  
 O,0,3.3783887848,-2.9776433127,0.1520925913  
 H,0,2.6303420903,-3.4647863813,0.5781949778  
 O,0,3.8867000793,-0.4122220394,-0.9459366809  
 O,0,1.9819621636,-0.7683736784,1.0315180153  
 H,0,-0.6090730943,-0.1029665644,0.1479462393  
 As,0,2.7140250257,-1.4633101015,-0.4578492898  
 H,0,0.0349953866,-2.8182276865,-0.1505478931  
 H,0,-1.3841704126,-3.278031636,3.8013858254  
 H,0,0.9677863085,-4.7051628697,3.4636317058

## $D_N^{\ddagger}A_N$ mechanism – transition structures with and without histidine mimic

### LG 2.3 with Histidine B3LYP/6-31G\*

Dnnd23  
 E(RB3LYP) = -1101.29073074

Zero-point correction= 0.318730  
 (Hartree/Particle)  
 Thermal correction to Energy= 0.340113  
 Thermal correction to Enthalpy= 0.341057  
 Thermal correction to Gibbs Free Energy= 0.263350  
 Sum of electronic and zero-point Energies= -  
 1100.972001  
 Sum of electronic and thermal Energies= -  
 1100.950618  
 Sum of electronic and thermal Enthalpies= -  
 1100.949674  
 Sum of electronic and thermal Free Energies= -  
 1101.027381

|       | E (Thermal) | CV             | S              |
|-------|-------------|----------------|----------------|
|       | KCal/Mol    | Cal/Mol-Kelvin | Cal/Mol-Kelvin |
| Total | 213.424     | 77.444         | 163.548        |

C,0,0.684670855,0.5689788573,-2.2681495316  
 C,0,0.8651879597,1.0039484125,-0.8564947946  
 O,0,1.4345025539,2.1701513448,-0.7660140405  
 C,0,1.5220053331,2.8081310902,-2.0974786134  
 C,0,0.6487311088,1.9238642922,-3.0042550122  
 C,0,1.1250487727,4.2634255118,-2.0024883641  
 O,0,2.1410257641,4.9454427042,-1.2952149364  
 O,0,1.2223926531,1.9334302564,-4.2943790388  
 N,0,-1.3544514614,1.2311749425,-0.2983129038  
 C,0,-2.0892106971,2.36993111,-0.1419877651  
 C,0,-3.1876297954,2.500236285,0.6561058168  
 C,0,-3.5969587187,1.3414771949,1.439726755  
 N,0,-2.7568630031,0.2214358839,1.2720403633  
 C,0,-1.6300530344,0.1440625076,0.4715672408  
 O,0,-0.9110172068,-0.8793489515,0.45920791  
 O,0,-4.5603177427,1.2869362313,2.1946671972  
 C,0,-4.0087273358,3.7522562776,0.766245675  
 N,0,-1.6280426524,-3.2393187569,1.9228982237  
 C,0,-1.3783423147,-3.4646675108,3.2602136743  
 C,0,-1.9652212776,-4.6741274204,3.544525703  
 C,0,-2.340680096,-4.3122221806,1.4731139842  
 H,0,-4.0522729942,4.1039995557,1.8038905759  
 H,0,-5.0459299215,3.5749842518,0.4572456207  
 H,0,-1.7596179692,3.2160468634,-0.7451981434  
 H,0,-2.9932501922,-0.5956043158,1.8261255841  
 H,0,-1.3237979754,-2.4284002318,1.3723634324  
 H,0,-3.5949350495,4.554078985,0.145048058  
 H,0,2.5711431175,2.7316232983,-2.3992558619  
 H,0,1.0166319441,4.6292948725,-3.0369247248  
 H,0,0.1455094419,4.3441427823,-1.5069583856  
 H,0,-0.3829657261,2.3029104873,-3.0190279063  
 H,0,-0.1838915568,-0.0751782724,-2.3944239979  
 H,0,1.5896042389,0.0209881689,-2.5760098538  
 H,0,0.5862253852,1.5514485125,-4.9182990038  
 H,0,1.8618321898,5.8639628774,-1.1636969175  
 H,0,0.9002698712,0.3519478774,0.0086610961  
 H,0,-2.6702449721,-4.3929062724,0.4453194349  
 H,0,-0.822121555,-2.7624702309,3.8636015066  
 H,0,-1.9917573798,-5.1965297992,4.4918899083  
 N,0,-2.565863971,-5.2001596118,2.4217102956

### LG 2.4 with Histidine B3LYP/6-31G\*

Dnnd24  
 E(RB3LYP) = -1101.28656569

Zero-point correction= 0.318445  
 (Hartree/Particle)  
 Thermal correction to Energy= 0.339928  
 Thermal correction to Enthalpy= 0.340873  
 Thermal correction to Gibbs Free Energy= 0.262285  
 Sum of electronic and zero-point Energies= -  
 1100.968121  
 Sum of electronic and thermal Energies= -  
 1100.946637  
 Sum of electronic and thermal Enthalpies= -  
 1100.945693  
 Sum of electronic and thermal Free Energies= -  
 1101.024280

|       | E (Thermal)<br>KCal/Mol | CV<br>Cal/Mol-Kelvin | S<br>Cal/Mol-Kelvin |
|-------|-------------------------|----------------------|---------------------|
| Total | 213.308                 | 77.561               | 165.401             |

C,0,0.6735709944,0.5218588933,-2.2098936539  
 C,0,0.8877885575,0.9801663112,-0.8141480823  
 O,0,1.4827231143,2.1267639355,-0.7464080362  
 C,0,1.5675917889,2.7463424431,-2.0911776644  
 C,0,0.6711630378,1.8612596558,-2.9757638752  
 C,0,1.1847295923,4.2056046668,-2.0027182938  
 O,0,2.2174840454,4.8840044966,-1.3171226072  
 O,0,1.2426858542,1.8282698868,-4.2659353821  
 N,0,-1.4285839284,1.3110529837,-0.280365535  
 C,0,-2.1827037451,2.4390157959,-0.1440767452  
 C,0,-3.2820152742,2.5719004227,0.6543896853  
 C,0,-3.6766358491,1.423663242,1.4586453961  
 N,0,-2.8243815348,0.3108179298,1.3062291972  
 C,0,-1.6984525983,0.2353971486,0.5041933501  
 O,0,-0.9713813127,-0.7857086847,0.5092077533  
 O,0,-4.637797834,1.3696599328,2.2174347196  
 C,0,-4.1178149453,3.8160175953,0.7416142415  
 N,0,-1.5987543467,-3.2061066916,1.9036160682  
 C,0,-1.2483842794,-3.5192814035,3.1995950879  
 C,0,-1.7900271106,-4.7596304789,3.4372683688  
 C,0,-2.3214315537,-4.261298057,1.4295788684  
 H,0,-4.1591680338,4.1917199998,1.7710833943  
 H,0,-5.1548639892,3.6194580491,0.4438665714  
 H,0,-1.8697855918,3.2791546513,-0.7655105856  
 H,0,-3.0503699806,-0.4998611157,1.873426112  
 H,0,-1.346996164,-2.3538435819,1.3895802456  
 H,0,-3.7178459233,4.6083159816,0.0993465805  
 H,0,2.6134060633,2.6528023706,-2.3984412705  
 H,0,1.0633559942,4.5635042459,-3.0386029782  
 H,0,0.2134371461,4.2965157153,-1.4931642074  
 H,0,-0.3512145193,2.2634432063,-2.995415518  
 H,0,-0.2166010227,-0.0971990112,-2.3069295462  
 H,0,1.5568204804,-0.0628231689,-2.5150426541  
 H,0,0.5922359437,1.4596847177,-4.8831498997  
 H,0,1.938114547,5.799296792,-1.1651269377  
 H,0,0.8470361272,0.361552171,0.0760979982  
 H,0,-2.7231200616,-4.2772274988,0.4246142951  
 H,0,-0.6645969184,-2.8475703836,3.8115825189  
 H,0,-1.7378790427,-5.3479101885,4.3441220906  
 N,0,-2.460721137,-5.2194050965,2.3250991895

### LG 2.5 with Histidine B3LYP/6-31G\*

Dnnd25  
 E(RB3LYP) = -1101.28292573

Zero-point correction= 0.318254  
 (Hartree/Particle)  
 Thermal correction to Energy= 0.339778  
 Thermal correction to Enthalpy= 0.340722  
 Thermal correction to Gibbs Free Energy= 0.262158

Sum of electronic and zero-point Energies= -  
 1100.964671  
 Sum of electronic and thermal Energies= -  
 1100.943148  
 Sum of electronic and thermal Enthalpies= -  
 1100.942204  
 Sum of electronic and thermal Free Energies= -  
 1101.020768

|       | E (Thermal)<br>KCal/Mol | CV<br>Cal/Mol-Kelvin | S<br>Cal/Mol-Kelvin |
|-------|-------------------------|----------------------|---------------------|
| Total | 213.214                 | 77.636               | 165.353             |

C,0,0.6777410123,0.4912764085,-2.1863257072  
 C,0,0.9387535295,0.9522196436,-0.8028957317  
 O,0,1.544119533,2.0869662814,-0.7480125911  
 C,0,1.6091107454,2.7056733244,-2.0993146629  
 C,0,0.6853717688,1.8263813701,-2.9617776057  
 C,0,1.2365500373,4.1663458401,-1.9965549044  
 O,0,2.2889043691,4.8358969291,-1.3331062645  
 O,0,1.235666567,1.7754213209,-4.2602973269  
 N,0,-1.469783956,1.3652834368,-0.2753299517  
 C,0,-2.2529082077,2.4729517672,-0.1391071988  
 C,0,-3.3493678263,2.5879776422,0.5164765382  
 C,0,-3.7139386916,1.4367006512,1.4789962421  
 N,0,-2.8405741185,0.3407323792,1.3208146107  
 C,0,-1.7194270476,0.2885611231,0.5115982435  
 O,0,-0.9738664022,-0.7233683362,0.5164765382  
 O,0,-4.667663504,1.3638808729,2.2463228822  
 C,0,-4.2101920599,3.8149793533,0.7544239898  
 N,0,-1.5791879193,-3.1589557213,1.8781267628  
 C,0,-1.2068269177,-3.4958912914,3.1618952278  
 C,0,-1.7337259476,-4.7459048133,3.3816735778  
 C,0,-2.2999541213,-4.2104230486,1.3932838554  
 H,0,-4.2525649071,4.1952392472,1.7822747564  
 H,0,-5.2451776144,3.5962355934,0.4647205723  
 H,0,-1.9670582886,3.317614285,-0.7683698841  
 H,0,-3.0452507241,-0.4727400456,1.8919264373  
 H,0,-1.3392342794,-2.2949521991,1.37646624  
 H,0,-3.8308980845,4.6122645612,0.1056904778  
 H,0,2.648441376,2.6033580654,-2.4242968526  
 H,0,1.0931281244,4.5279717488,-3.0284570692  
 H,0,0.277518709,4.259307459,-1.4649189795  
 H,0,-0.3313261118,2.2420357189,-2.9656843841  
 H,0,-0.2320749527,-0.1040934627,-2.2485080741  
 H,0,1.5363573013,-0.1192636613,-2.5109752977  
 H,0,0.565172752,1.4261848365,-4.867233728  
 H,0,2.0140276783,5.7486739968,-1.1593490424  
 H,0,0.8476074997,0.3564504186,0.1007326919  
 H,0,-2.7170273155,-4.2089574543,0.394464351  
 H,0,-0.620353644,-2.8315276801,3.7793404981  
 H,0,-1.6629387009,-5.3522943038,4.2752585262  
 N,0,-2.4165330705,-5.1888343771,2.2700521969

### LG 2.6 with Histidine B3LYP/6-31G\*

Dnnd26  
 E(RB3LYP) = -1101.27973655

Zero-point correction= 0.318039  
 (Hartree/Particle)  
 Thermal correction to Energy= 0.339668  
 Thermal correction to Enthalpy= 0.340612  
 Thermal correction to Gibbs Free Energy= 0.261163  
 Sum of electronic and zero-point Energies= -  
 1100.961698  
 Sum of electronic and thermal Energies= -  
 1100.940069



Sum of electronic and thermal Enthalpies= -  
1100.939124  
Sum of electronic and thermal Free Energies= -  
1101.018574

|       | E (Thermal) | CV             | S              |
|-------|-------------|----------------|----------------|
| Total | KCal/Mol    | Cal/Mol-Kelvin | Cal/Mol-Kelvin |
|       | 213.145     | 77.789         | 167.216        |

C,0,0.6210793908,0.4381415548,-2.1503781722  
C,0,0.9566500374,0.8829677969,-0.7806177598  
O,0,1.6003479442,1.9914878166,-0.7415272658  
C,0,1.6370819291,2.6198655033,-2.0921504697  
C,0,0.6624296569,1.7711409522,-2.9301201742  
C,0,1.3010586232,4.0868633495,-1.9575836776  
O,0,2.392108666,4.7240081085,-1.3257162582  
O,0,1.1832511913,1.6953300443,-4.2392643609  
N,0,-1.5172520601,1.4640970742,-0.2309774095  
C,0,-2.3224751215,2.5588086929,-0.1256543534  
C,0,-3.436164021,2.6712519587,0.6586063908  
C,0,-3.8022422909,1.4488498409,2.2269016711  
N,0,-2.9117065352,0.4410235625,1.3469238323  
C,0,-1.7764131113,0.392464811,0.5565823786  
O,0,-1.0274991979,-0.6174536941,0.5904063495  
O,0,-4.7693516725,1.4488498409,2.2269016711  
C,0,-4.3122909815,3.8893417756,0.7137095305  
N,0,-1.5201077429,-3.1261293376,1.8594078807  
C,0,-1.1366510384,-3.4952356422,3.1306584812  
C,0,-1.5666257173,-4.7917592765,3.2828627593  
C,0,-2.1508745955,-4.2051160066,1.3144028686  
H,0,-4.3737427368,4.2866876126,1.7342388858  
H,0,-5.3405789882,3.6537550695,0.4134288336  
H,0,-2.0368419701,3.3997962528,-0.7605400335  
H,0,-3.1200640221,-0.3698931875,1.9198923453  
H,0,-1.3446043099,-2.2223579316,1.4036848322  
H,0,-3.9331983756,4.6802532025,0.0569643836  
H,0,2.6629214615,2.4952155096,-2.449802131  
H,0,1.1274629842,4.4655827118,-2.9787554712  
H,0,0.3646734256,4.1914018474,-1.3893296448  
H,0,-0.3385408459,2.2222374322,-2.9133764847  
H,0,-0.3153510174,-0.1149472301,-2.1753048261  
H,0,1.4367113398,-0.2143401911,-2.5046230542  
H,0,0.4844040049,1.3809020381,-4.8331388001  
H,0,2.1376887814,5.6341417763,-1.1116647226  
H,0,0.831872146,0.3047743195,0.1295351917  
H,0,-2.5564555022,-4.1870189593,0.3110129721  
H,0,-0.6108523253,-2.8182143234,3.7877987486  
H,0,-1.4582324108,-5.4336870324,4.1474159594  
N,0,-2.2010084022,-5.2313731061,2.1417488207

### LG 2.7 with Histidine B3LYP/6-31G\*

Dnnd27

E(RB3LYP) = -1101.27705566

|                                              |          |
|----------------------------------------------|----------|
| Zero-point correction=                       | 0.317931 |
| (Hartree/Particle)                           |          |
| Thermal correction to Energy=                | 0.340496 |
| Thermal correction to Enthalpy=              | 0.341440 |
| Thermal correction to Gibbs Free Energy=     | 0.257045 |
| Sum of electronic and zero-point Energies=   | -        |
| 1100.959124                                  |          |
| Sum of electronic and thermal Energies=      | -        |
| 1100.936560                                  |          |
| Sum of electronic and thermal Enthalpies=    | -        |
| 1100.935616                                  |          |
| Sum of electronic and thermal Free Energies= | -        |
| 1101.020011                                  |          |

| E (Thermal) | CV | S |
|-------------|----|---|
|-------------|----|---|

| Total | KCal/Mol | Cal/Mol-Kelvin | Cal/Mol-Kelvin |
|-------|----------|----------------|----------------|
|       | 213.664  | 79.810         | 177.624        |

C,0,0.5060112286,0.4213436843,-2.2693824907  
C,0,0.9590513779,0.7186332285,-0.8948466417  
O,0,1.6694364544,1.7761907404,-0.7994007058  
C,0,1.6695245227,2.5262288351,-2.0901954144  
C,0,0.6061326523,1.8089425414,-2.9433939468  
C,0,1.414087873,3.9863422199,-1.7970700521  
O,0,2.569442628,4.5114638102,-1.1767706312  
O,0,1.0654131611,1.8044322994,-4.2773589695  
N,0,-1.5185344173,1.5476387662,-0.2134399462  
C,0,-2.3527419048,2.6200300185,-0.1034847639  
C,0,-3.5049802016,2.6815513781,0.630604768  
C,0,-3.8893410504,1.4976482287,1.3794816364  
N,0,-2.977686214,0.4307662259,1.2399842068  
C,0,-1.8128867241,0.4338225931,0.493167729  
O,0,-1.0705921798,-0.5882126938,0.4872388847  
O,0,-4.8874609948,1.3708977857,2.0825269228  
C,0,-4.3990909925,3.8857913402,0.7025068661  
N,0,-1.4585407902,-3.0498227567,1.37915695944  
C,0,-1.0975766907,-3.3320132314,3.1713381402  
C,0,-1.4373621019,-4.6487817931,3.3701274395  
C,0,-1.9878545771,-4.1962575344,1.3570667823  
H,0,-4.510811223,4.2354093239,1.7361771997  
H,0,-5.410140121,3.6525970817,0.346621461  
H,0,-2.0489596929,3.4958514444,-0.6806885964  
H,0,-3.2033182063,-0.4108347888,1.7595231495  
H,0,-1.3308172409,-2.1569777756,1.3791982611  
H,0,-4.0024835228,4.7105367598,0.0998202939  
H,0,2.6679507474,2.3872475431,-2.5133914306  
H,0,1.2012452794,4.4690489271,-2.7656403582  
H,0,0.5176514668,4.0733613802,-1.1654780098  
H,0,-0.3604094808,2.3187742526,-2.8425778483  
H,0,-0.474125735,-0.0534819959,-2.2716648269  
H,0,1.2408833341,-0.2616388969,-2.7277709744  
H,0,0.3195027646,1.5989288944,-4.8615464801  
H,0,2.3645220462,5.3958871835,-0.83821395  
H,0,0.799676504,0.0966575953,-0.0148802186  
H,0,-2.3556462847,-4.2534553274,0.3406600825  
H,0,-0.6487765411,-2.5886253478,3.8136675154  
H,0,-1.3155752482,-5.2412736039,4.2675497124  
N,0,-1.9942033146,-5.1852704558,2.2299638697

### LG 2.2 without Histidine B3LYP/6-31G\*

22

E(RB3LYP) = -875.068013945

C,0,-1.7359265922,-1.0219967427,-1.4264130307  
C,0,-0.3133197421,-0.6021964058,-1.5754005029  
O,0,-0.205573858,0.6531738658,-1.9691853292  
C,0,-1.4760759255,1.3605363181,-1.7480019339  
C,0,-2.4407565033,0.3093506211,-1.1355210611  
N,0,0.3965728658,-0.5768602317,0.400810644  
C,0,1.314568521,0.376734607,0.7193319836  
C,0,2.049557842,0.3946643589,1.8676390492  
C,0,1.8612645864,-0.7034783497,2.8088861917  
N,0,0.9297303732,-1.6659448536,2.3793558952  
C,0,0.2059227303,-1.6843549838,1.1883646732  
O,0,-0.5439437788,-2.6214416415,0.9083681228  
O,0,2.4366099105,-0.830994282,3.8849945631  
C,0,3.0399236353,1.4673249489,2.2195300662  
C,0,-1.2432179067,2.5815355981,-0.8812582655  
O,0,-3.7212995992,0.3195530039,-1.7409204491  
H,0,-2.2319244208,3.032425502,-0.6815691368  
H,0,0.7922393765,-2.4605142704,2.9940331483  
H,0,1.4221314289,1.1655811708,-0.0253553509  
H,0,-2.0845636716,-1.3987000835,-2.4001080316  
H,0,-1.8553549492,-1.796386146,-0.6690001037

H,0,-1.8247963303,1.6616880365,-2.7399669176  
 H,0,-2.5144442231,0.4568763111,-0.0501197115  
 H,0,3.1026387151,2.2231761731,1.4291038197  
 H,0,2.7688000237,1.9670659621,3.1576651111  
 H,0,4.0402435659,1.0455049977,2.3741694148  
 H,0,-0.8196877708,2.2660913675,0.0830588591  
 O,0,-0.3887639368,3.469597414,-1.5757178365  
 H,0,-0.17856156,4.2115497331,-0.9888081382  
 H,0,0.4790228268,-1.2564108829,-1.9236798364  
 H,0,-4.2692617631,0.9844761842,-1.2978660564

### LG 2.3 without Histidine B3LYP/6-31G\*

E(RB3LYP) = -875.064849458

C,0,-1.5901380803,-1.0326012853,-1.5568034255  
 C,0,-0.2231192947,-0.4536169811,-1.6163516141  
 O,0,-0.2170543056,0.8072780735,-1.9675509449  
 C,0,-1.5630296034,1.3840503127,-1.7740556053  
 C,0,-2.4518887061,0.2092165555,-1.2835891489  
 N,0,0.320414495,-0.355075973,0.5131696231  
 C,0,1.422476774,0.4113619212,0.7580479158  
 C,0,2.2077077047,0.3338941633,1.8700139526  
 C,0,1.8674618417,-0.6734861566,2.8678495556  
 N,0,0.7481405613,-1.4512286481,2.5245934521  
 C,0,-0.03186802,-1.3654870134,1.3731316076  
 O,0,-0.9748216329,-2.1421741641,1.1898012614  
 O,0,2.4652401137,-0.8717682636,3.9210951924  
 C,0,3.3892892743,1.2226692562,2.1325059067  
 C,0,-1.4688093387,2.5529615973,-0.8161954515  
 O,0,-3.6745283487,0.1266946174,-1.9957035469  
 H,0,-2.5022945338,2.8716102858,-0.5908013422  
 H,0,0.4857694846,-2.1754726272,3.1838408695  
 H,0,1.6351069368,1.1508172954,-0.0150708501  
 H,0,-1.8400602702,-1.4340110631,-2.55092587  
 H,0,-1.6743579286,-1.8103991439,-0.7953258935  
 H,0,-1.8844968161,1.7213461983,-2.7628488837  
 H,0,-2.6237890431,0.291267142,-0.2036337472  
 H,0,3.553973632,1.9178623926,1.3021328692  
 H,0,3.2529108059,1.8065920784,3.0511589123  
 H,0,4.3021858475,0.6323946801,2.276628285  
 H,0,-1.0097399589,2.2091521332,0.1212705584  
 O,0,-0.7244806433,3.5833619335,-1.4384418138  
 H,0,-0.5282066276,4.2605204962,-0.7738603693  
 H,0,0.680661976,-0.9998440742,-1.8599209242  
 H,0,-4.3569024253,0.5997415609,-1.4977406806

### LG 2.4 without Histidine B3LYP/6-31G\*

E(RB3LYP) = -875.060391938

C,0,-1.3936608412,-0.9562416629,-1.6357058844  
 C,0,-0.1285391531,-0.185106082,-1.6986936458  
 O,0,-0.3049162976,1.0643271629,-2.0077517051  
 C,0,-1.7260586476,1.4377926728,-1.8088769186  
 C,0,-2.4094762976,0.1554026739,-1.2970681846  
 N,0,0.4150784341,-0.0802873883,0.5336799645  
 C,0,1.6689629769,0.3991081784,0.780941734  
 C,0,2.3981393758,0.1795509959,1.91319966  
 C,0,1.8078123166,-0.6649722605,2.9432122411  
 N,0,0.5316096983,-1.1482871722,2.6075888943  
 C,0,-0.1881264224,-0.9116278402,1.4393420777  
 O,0,-1.3058554381,-1.4242120739,1.2785391764  
 O,0,2.3248539734,-0.9618719903,4.0163234712  
 C,0,3.7577251116,0.7637276177,2.1684572822  
 C,0,-1.7964073915,2.6178551516,-0.8655978595  
 O,0,-3.6627972345,0.0394911578,-1.9457444191  
 H,0,-2.8578613085,2.7456762321,-0.5948062294  
 H,0,0.0836640467,-1.7466490051,3.2925634569

H,0,2.0744641217,1.0336443348,-0.0082820148  
 H,0,-1.5968206156,-1.3577057749,-2.6411910555  
 H,0,-1.3726913484,-1.7555030006,-0.8939998956  
 H,0,-2.1020748975,1.7122599654,-2.7980801333  
 H,0,-2.51630841,0.1823515827,-0.2067420035  
 H,0,4.0942616982,1.3696814957,1.3202134012  
 H,0,3.7578190716,1.3948093049,3.0656767588  
 H,0,4.4988287395,-0.0247140003,2.3474187896  
 H,0,-1.2344280902,2.3741652862,0.0469902381  
 O,0,-1.2785181933,3.7528871267,-1.5363984974  
 H,0,-1.1984123193,4.4734259971,-0.8937894882  
 H,0,0.8599215587,-0.5788129344,-1.9063851449  
 H,0,-4.2084343467,-0.5725384509,-1.4286148463

### LG 2.5 without Histidine B3LYP/6-31G\*

E(RB3LYP) = -875.056508687

C,0,-1.3847398868,-0.9518907222,-1.6257814573  
 C,0,-0.1405674809,-0.160844828,-1.7449197307  
 O,0,-0.3374056897,1.0783302737,-2.057636254  
 C,0,-1.7635281922,1.4354794913,-1.8418546993  
 C,0,-2.4202684862,0.1488683794,-1.3067884387  
 N,0,0.4046528509,0.0197080081,0.5853450691  
 C,0,1.6723481193,0.458700435,0.8360262624  
 C,0,2.4192583726,0.1711831775,1.9425248424  
 C,0,1.8328846794,-0.7109144213,2.9420695836  
 N,0,0.5432723062,-1.1551901197,2.6063751059  
 C,0,-0.1886815166,-0.8477650987,1.4624235788  
 O,0,-1.3161060803,-1.3416744433,1.2951667877  
 O,0,2.3636548906,-1.0685383456,3.9902189139  
 C,0,3.7927413113,0.7205726536,2.1999098783  
 C,0,-1.8271204343,2.6222517105,-0.9066813125  
 O,0,-3.6719353887,-0.0025817197,-1.9506646858  
 H,0,-2.8844653505,2.7416368614,-0.6165315362  
 H,0,0.0968849022,-1.780508001,3.2678438859  
 H,0,2.0792239421,1.1240841715,0.0727606706  
 H,0,-1.5984736943,-1.4036201101,-2.6078890785  
 H,0,-1.3326752602,-1.7178401799,-0.8495145036  
 H,0,-2.1549772006,1.6965104054,-2.8285425894  
 H,0,-2.5226996563,0.1905800733,-0.2167420268  
 H,0,4.1261937798,1.3569872958,1.3729297914  
 H,0,3.8190288197,1.3123118639,3.1232898523  
 H,0,4.52273566,-0.0872639551,2.332397556  
 H,0,-1.2450624628,2.389170081,-0.0043184382  
 O,0,-1.3343657327,3.7569953974,-1.596724438  
 H,0,-1.2080857569,4.4707280472,-0.9540776155  
 H,0,0.8613516022,-0.535766135,-1.9214540946  
 H,0,-4.2113190963,-0.6020729463,-1.4127410291

### LG 2.6 without Histidine B3LYP/6-31G\*

E(RB3LYP) = -875.053130378

C,0,-1.3897909875,-0.9540426956,-1.6194820067  
 C,0,-0.1602659088,-0.1581821963,-1.800761845  
 O,0,-0.3661236582,1.0753215529,-2.1106316483  
 C,0,-1.7904126456,1.4316534781,-1.8652400797  
 C,0,-2.4352274828,0.1438088965,-1.3184820801  
 N,0,0.398329071,0.0955319362,0.6227889447  
 C,0,1.6720903199,0.5117904997,0.8792295414  
 C,0,2.4307609104,0.1759307981,1.9652534607  
 C,0,1.8497864631,-0.7388590774,2.9373469649  
 N,0,0.5542576936,-1.1615238755,2.5982341854  
 C,0,-0.1854081323,-0.8018352928,1.4747316434  
 O,0,-1.3177538361,-1.2866815504,1.2999730584  
 O,0,2.3893796707,-1.1398632482,3.9655889485  
 C,0,3.8106935521,0.706368167,2.227168623  
 C,0,-1.8276896912,2.6143945381,-0.9234664241

O,0,-3.6830259053,-0.0276077415,-1.9654001845  
 H,0,-2.8783664002,2.7380215972,-0.6114988474  
 H,0,0.1103517912,-1.809422194,3.2392858719  
 H,0,2.0783055137,1.2036470544,0.1391457848  
 H,0,-1.6202728362,-1.4573557811,-2.5724198233  
 H,0,-1.3089740821,-1.6824304872,-0.8079288546  
 H,0,-2.1992167288,1.6959937394,-2.8437369131  
 H,0,-2.5407418488,0.1963900257,-0.2293757032  
 H,0,4.1392549319,1.3707035755,1.4203526829  
 H,0,3.851786948,1.2635498086,3.1713517149  
 H,0,4.5368252599,-0.110375027,2.3215594293  
 H,0,-1.2284500651,2.3714706719,-0.0352797783  
 O,0,-1.3432220554,3.7494671767,-1.6187873156  
 H,0,-1.1793375202,4.4525274583,-0.9729471554  
 H,0,0.8474908156,-0.5246027147,-1.9637616536  
 H,0,-4.2232792866,-0.6161617927,-1.4163906912

### $D_N^*A_N^\ddagger$ mechanism– transition structures with and without histidine mimic

#### Nuc 2.2 with Histidine B3LYP/6-31G\*

E(RB3LYP) = -3183.65102565

|                                              |          |
|----------------------------------------------|----------|
| Zero-point correction=                       | 0.252453 |
| (Hartree/Particle)                           |          |
| Thermal correction to Energy=                | 0.272121 |
| Thermal correction to Enthalpy=              | 0.273065 |
| Thermal correction to Gibbs Free Energy=     | 0.201443 |
| Sum of electronic and zero-point Energies=   | -        |
| 3183.398573                                  |          |
| Sum of electronic and thermal Energies=      | -        |
| 3183.378905                                  |          |
| Sum of electronic and thermal Enthalpies=    | -        |
| 3183.377961                                  |          |
| Sum of electronic and thermal Free Energies= | -        |
| 3183.449583                                  |          |

|       | E (Thermal)<br>KCal/Mol | CV<br>Cal/Mol-Kelvin | S<br>Cal/Mol-Kelvin |
|-------|-------------------------|----------------------|---------------------|
| Total | 170.758                 | 70.620               | 150.742             |

C,0,-0.513198098,0.8514886378,-1.7499195603  
 C,0,0.2717552348,0.9879867651,-0.4952385225  
 O,0,1.3260368757,1.7153262126,-0.6480515587  
 C,0,1.6962919886,1.7849973768,-2.0935183739  
 C,0,0.6109194273,0.9377345527,-2.8206575001  
 C,0,1.7436394061,3.2399027319,-2.5131758829  
 O,0,2.6867240637,3.917206082,-1.7076500175  
 O,0,1.0574425232,-0.32000153,-3.2302322003  
 N,0,-1.428457982,-4.2191055687,1.397481196  
 C,0,-0.9824960782,-5.1544184947,2.312480189  
 C,0,0.3652785981,-4.9349677993,2.4225130181  
 N,0,0.742502705,-3.8942422063,1.602069403  
 C,0,-0.3558492486,-3.4832381075,0.9980309336  
 H,0,-2.3789221467,-4.1065904223,1.0768893439  
 H,0,2.8950486532,0.4423354797,1.777358456  
 H,0,2.6789128799,1.307940474,-2.121959696  
 H,0,2.0219610558,3.2513168712,-3.579495685  
 H,0,0.7371055435,3.6868669962,-2.4297664646  
 H,0,0.2608367014,1.457432076,-3.7183816594  
 H,0,-1.2029458867,1.7074695091,-1.8121891186  
 H,0,-1.0855325023,-0.0730576166,-1.8140839494  
 H,0,1.2381542351,-0.8283319199,-2.402762942  
 H,0,2.7668436378,4.8260417832,-2.0341733972  
 O,0,0.9745874657,-1.0944729545,-0.5921334163  
 O,0,2.9899798869,-2.6377422092,0.5811472922  
 H,0,2.2275083528,-3.1074668659,1.031601705  
 O,0,3.7123817457,-0.2244357332,-0.6830383528

O,0,2.15970053,-0.1837974345,1.6623454691  
 H,0,-0.0582929525,0.8509344367,0.5274769693  
 As,0,2.5352381371,-1.026411898,0.1308201959  
 H,0,-0.3917258359,-2.6711606315,0.2826388637  
 H,0,-1.6471143144,-5.8638525622,2.7810513123  
 H,0,1.0843995677,-5.4574004709,3.0370952306

#### Nuc 2.3 with Histidine B3LYP/6-31G\*

Anhisdis2.3

E(RB3LYP) = -3183.64737417

|                                              |          |
|----------------------------------------------|----------|
| Zero-point correction=                       | 0.252268 |
| (Hartree/Particle)                           |          |
| Thermal correction to Energy=                | 0.271963 |
| Thermal correction to Enthalpy=              | 0.272908 |
| Thermal correction to Gibbs Free Energy=     | 0.201219 |
| Sum of electronic and zero-point Energies=   | -        |
| 3183.395106                                  |          |
| Sum of electronic and thermal Energies=      | -        |
| 3183.375411                                  |          |
| Sum of electronic and thermal Enthalpies=    | -        |
| 3183.374467                                  |          |
| Sum of electronic and thermal Free Energies= | -        |
| 3183.446155                                  |          |

|       | E (Thermal)<br>KCal/Mol | CV<br>Cal/Mol-Kelvin | S<br>Cal/Mol-Kelvin |
|-------|-------------------------|----------------------|---------------------|
| Total | 170.660                 | 70.686               | 150.880             |

C,0,-0.5266783598,0.9034292664,-1.7312419306  
 C,0,0.2561545202,1.0714107874,-0.4824764915  
 O,0,1.3305340471,1.7526963318,-0.6494801808  
 C,0,1.70062444558,1.787834196,-2.1008224109  
 C,0,0.5978170576,0.9446665462,-2.8070311111  
 C,0,1.7725091945,3.2329003108,-2.5484507991  
 O,0,2.7192523072,3.9126754448,-1.7501011833  
 O,0,1.0169434925,-0.3270676902,-3.1923784115  
 N,0,-1.4114780373,-4.2650030373,1.3764323178  
 C,0,-0.9670893132,-5.1975449032,2.2951031887  
 C,0,0.3764999121,-4.9627875115,2.4234772401  
 N,0,0.7528216497,-3.9159206932,1.6104575992  
 C,0,-0.3420652562,-3.5159030137,0.9926930169  
 H,0,-2.3586792729,-4.162769731,1.0430864623  
 H,0,2.8606503966,0.4369055983,1.8004433713  
 H,0,2.6739422562,1.2907605924,-2.1114560268  
 H,0,2.0581753031,3.2164830882,-3.6127201987  
 H,0,0.7720694367,3.6965179185,-2.4829054867  
 H,0,0.2539203205,1.4556675796,-3.712387503  
 H,0,-1.2085842253,1.7637998613,-1.8199379257  
 H,0,-1.1088547913,-0.0166793323,-1.7637033606  
 H,0,1.1860898511,-0.8285018654,-2.3544609621  
 H,0,2.8252372126,4.8092753561,-2.1021270088  
 O,0,0.9530911141,-1.1181151973,-0.5837464516  
 O,0,2.9969972828,-2.6164604419,0.6181910109  
 H,0,2.2380012406,-3.1007682168,1.0571499299  
 O,0,3.6763719313,-0.2042695819,-0.6668772469  
 O,0,2.1097397554,-0.1659259694,1.6642137451  
 H,0,-0.0562681272,0.9250135136,0.5450556532  
 As,0,2.5044146437,-1.0221287641,0.1417925702  
 H,0,-0.3769818462,-2.7016912597,0.2791000829  
 H,0,-1.6297013945,-5.915707804,2.7531483011  
 H,0,1.0932374125,-5.4785058186,3.0465314801

#### Nuc 2.4 with Histidine B3LYP/6-31G\*

Anhisdis2.4

E(RB3LYP) = -3183.64415745

|                        |          |
|------------------------|----------|
| Zero-point correction= | 0.252087 |
| (Hartree/Particle)     |          |

Thermal correction to Energy= 0.271814  
 Thermal correction to Enthalpy= 0.272758  
 Thermal correction to Gibbs Free Energy= 0.200950  
 Sum of electronic and zero-point Energies= -  
 3183.392070  
 Sum of electronic and thermal Energies= -  
 3183.372344  
 Sum of electronic and thermal Enthalpies= -  
 3183.371399  
 Sum of electronic and thermal Free Energies= -  
 3183.443207

|                                              | E (Thermal)<br>KCal/Mol | CV<br>Cal/Mol-Kelvin | S<br>Cal/Mol-Kelvin |
|----------------------------------------------|-------------------------|----------------------|---------------------|
| Total                                        | 170.566                 | 70.740               | 151.133             |
| C,0,-0.5417504329,0.9643228755,-1.7082234612 |                         |                      |                     |
| C,0,0.2422506882,1.1661882372,-0.468094669   |                         |                      |                     |
| O,0,1.3384493509,1.795367122,-0.6533057177   |                         |                      |                     |
| C,0,1.7053462879,1.7866594391,-2.1102107226  |                         |                      |                     |
| C,0,0.5801810614,0.9508959451,-2.7898789858  |                         |                      |                     |
| C,0,1.8075853048,3.21832829,-2.5925976059    |                         |                      |                     |
| O,0,2.7630895849,3.899632917,-1.8067472909   |                         |                      |                     |
| O,0,0.9655309315,-0.3369135878,-3.1471298328 |                         |                      |                     |
| N,0,-1.3928519898,-4.3191537343,1.3534313285 |                         |                      |                     |
| C,0,-0.9449793571,-5.2584142746,2.2636184804 |                         |                      |                     |
| C,0,0.3924553095,-5.0025647131,2.414265632   |                         |                      |                     |
| N,0,0.7621607406,-3.9381792094,1.6211746764  |                         |                      |                     |
| C,0,-0.3309937922,-3.5471056256,0.994538196  |                         |                      |                     |
| H,0,-2.3369558499,-4.2278837588,1.0084033391 |                         |                      |                     |
| H,0,2.8233404152,0.4443347302,1.8308880798   |                         |                      |                     |
| H,0,2.6668378775,1.2663335728,-2.1028329785  |                         |                      |                     |
| H,0,2.0977673109,3.167593923,-3.6545439274   |                         |                      |                     |
| H,0,0.816257068,3.7034925875,-2.5454635009   |                         |                      |                     |
| H,0,0.2429010975,1.4508390641,-3.7041445093  |                         |                      |                     |
| H,0,-1.2132785614,1.829603111,-1.8262521328  |                         |                      |                     |
| H,0,-1.1368762347,0.051762359,-1.7037693339  |                         |                      |                     |
| H,0,1.126026539,-0.8287563954,-2.2979032182  |                         |                      |                     |
| H,0,2.8976194165,4.7804574397,-2.1876841741  |                         |                      |                     |
| O,0,0.9251681613,-1.132665244,-0.5624167741  |                         |                      |                     |
| O,0,2.9969859555,-2.5837098657,0.6677419337  |                         |                      |                     |
| H,0,2.2423989498,-3.0860737106,1.092253424   |                         |                      |                     |
| O,0,3.6358425639,-0.1802787016,-0.645669787  |                         |                      |                     |
| O,0,2.0578202841,-0.1344438852,1.6738467955  |                         |                      |                     |
| H,0,-0.0575861762,1.0256669711,0.5647300355  |                         |                      |                     |
| As,0,2.4688898643,-1.008330271,0.1628827641  |                         |                      |                     |
| H,0,-0.3688106219,-2.7228980878,0.2921442862 |                         |                      |                     |
| H,0,-1.6013739718,-5.9944911729,2.7017870391 |                         |                      |                     |
| H,0,1.1092663948,-5.5153353255,3.0397338917  |                         |                      |                     |

### Nuc 2.5 with Histidine B3LYP/6-31G\*

Anhisd2.5  
 E(RB3LYP) = -3183.64130469

Zero-point correction= 0.251939  
 (Hartree/Particle)  
 Thermal correction to Energy= 0.271684  
 Thermal correction to Enthalpy= 0.272628  
 Thermal correction to Gibbs Free Energy= 0.200838  
 Sum of electronic and zero-point Energies= -  
 3183.389366  
 Sum of electronic and thermal Energies= -  
 3183.369621  
 Sum of electronic and thermal Enthalpies= -  
 3183.368677  
 Sum of electronic and thermal Free Energies= -  
 3183.440467

|  | E (Thermal)<br>KCal/Mol | CV<br>Cal/Mol-Kelvin | S<br>Cal/Mol-Kelvin |
|--|-------------------------|----------------------|---------------------|
|--|-------------------------|----------------------|---------------------|

Total 170.484 70.771 151.095

C,0,-0.5556168179,1.0182288768,-1.687844932  
 C,0,0.228850549,1.251462813,-0.455999538  
 O,0,1.3432011542,1.8335292072,-0.6548958565  
 C,0,1.7080057015,1.7856239605,-2.1158376571  
 C,0,0.5628525265,0.9598207538,-2.7741309418  
 C,0,1.8397374551,3.2043416669,-2.6276667864  
 O,0,2.8042942496,3.8844350396,-1.8524644659  
 O,0,0.9181239099,-0.3391596968,-3.1125436042  
 N,0,-1.3725467686,-4.3677264281,1.33096324  
 C,0,-0.924101944,-5.305525871,2.2424449479  
 C,0,0.4075619561,-5.0320682459,2.4122156882  
 N,0,0.7729183298,-3.9575776756,1.6307863548  
 C,0,-0.3170077818,-3.5783814775,0.9911315254  
 H,0,-2.3128280775,-4.2880576578,0.972935178  
 H,0,2.7793704474,0.4425690383,1.8592529519  
 H,0,2.6580341314,1.2443345054,-2.0913427759  
 H,0,2.1333983164,3.1230761609,-3.6867222316  
 H,0,0.8579231565,3.7099851706,-2.5972239503  
 H,0,0.2304428259,1.4535587131,-3.6938416288  
 H,0,-1.2208015076,1.8847187424,-1.831512489  
 H,0,-1.1595099953,0.1118712972,-1.6509967836  
 H,0,1.0739980257,-0.8267749859,-2.2561974247  
 H,0,2.9673630124,4.7487340424,-2.2592372998  
 O,0,0.9027660456,-1.1539962115,-0.5540053405  
 O,0,2.9975454979,-2.5558607083,0.7072836768  
 H,0,2.2482440506,-3.0738165546,1.1209289393  
 O,0,3.5996818851,-0.1592323967,-0.628224205  
 O,0,2.0025760733,-0.1127806587,1.6757190146  
 H,0,-0.0633864654,1.1206279602,0.5810447911  
 As,0,2.4365106116,-0.9994722891,0.1758314549  
 H,0,-0.3559302671,-2.7502400562,0.2928963608  
 H,0,-1.5759358398,-6.0532782101,2.6674999644  
 H,0,1.1229797234,-5.5386832646,3.044325103

### Nuc 2.6 with Histidine B3LYP/6-31G\*

Anhisd2.6  
 E(RB3LYP) = -3183.63874095

Zero-point correction= 0.251779  
 (Hartree/Particle)  
 Thermal correction to Energy= 0.271534  
 Thermal correction to Enthalpy= 0.272478  
 Thermal correction to Gibbs Free Energy= 0.200736  
 Sum of electronic and zero-point Energies= -  
 3183.386962  
 Sum of electronic and thermal Energies= -  
 3183.367207  
 Sum of electronic and thermal Enthalpies= -  
 3183.366263  
 Sum of electronic and thermal Free Energies= -  
 3183.438005

|  | E (Thermal)<br>KCal/Mol | CV<br>Cal/Mol-Kelvin | S<br>Cal/Mol-Kelvin |
|--|-------------------------|----------------------|---------------------|
|--|-------------------------|----------------------|---------------------|

Total 170.390 70.789 150.995

C,0,-0.5651049309,1.0693031156,-1.6641529038  
 C,0,0.2248688442,1.3308412649,-0.4432922754  
 O,0,1.3533110311,1.8712834846,-0.6574574763  
 C,0,1.7111796753,1.7874076757,-2.1227588419  
 C,0,0.5454557483,0.9727932242,-2.7588675786  
 C,0,1.8687443627,3.1937880588,-2.6600151226  
 O,0,2.84455089,3.8713392711,-1.8973386105  
 O,0,0.8708808336,-0.3355334431,-3.081878681  
 N,0,-1.3506109735,-4.4189225048,1.3045422194  
 C,0,-0.904606289,-5.3469234414,2.2272414455  
 C,0,0.4191683398,-5.0518089093,2.4209516339

N,0,0.7823663636,-3.9744349369,1.64241904  
 C,0,-0.3012074948,-3.6145167318,0.9810842119  
 H,0,-2.2848128949,-4.3556975265,0.9278526546  
 H,0,2.7255529214,0.4219736539,1.8976436094  
 H,0,2.6500497111,1.2273155099,-2.0858126631  
 H,0,2.1612156779,3.0860259153,-3.7170193071  
 H,0,0.8962734232,3.7179747049,-2.641124324  
 H,0,0.2142224391,1.4622172793,-3.6815991908  
 H,0,-1.2275197756,1.9345214726,-1.8264644846  
 H,0,-1.1740710935,0.167594018,-1.5973525393  
 H,0,1.0228878216,-0.818978105,-2.2176786679  
 H,0,3.0357366149,4.7173751382,-2.3294404818  
 O,0,0.8840870542,-1.1815100771,-0.5595780159  
 O,0,2.9972337071,-2.5284957362,0.7472850434  
 H,0,2.2531662036,-3.0603391175,1.1512481261  
 O,0,3.563567278,-0.1440495083,-0.6206198428  
 O,0,1.9371074661,-0.0982020196,1.667279039  
 H,0,-0.0590244935,1.2144707868,0.5984451971  
 As,0,2.4051460146,-0.9950251535,0.1806280239  
 H,0,-0.3389053529,-2.7890390968,0.2792874622  
 H,0,-1.5524991789,-6.1034394983,2.6427530148  
 H,0,1.1303042261,-5.545023208,3.0683615663

### Nuc 2.7 with Histidine B3LYP/6-31G\*

Anhisdis2.7

E(RB3LYP) = -3183.63648089

|                                              |          |
|----------------------------------------------|----------|
| Zero-point correction=                       | 0.251669 |
| (Hartree/Particle)                           |          |
| Thermal correction to Energy=                | 0.271434 |
| Thermal correction to Enthalpy=              | 0.272378 |
| Thermal correction to Gibbs Free Energy=     | 0.200670 |
| Sum of electronic and zero-point Energies=   | -        |
| 3183.384812                                  |          |
| Sum of electronic and thermal Energies=      | -        |
| 3183.365047                                  |          |
| Sum of electronic and thermal Enthalpies=    | -        |
| 3183.364103                                  |          |
| Sum of electronic and thermal Free Energies= | -        |
| 3183.435811                                  |          |

|       | E (Thermal) | CV             | S              |
|-------|-------------|----------------|----------------|
|       | KCal/Mol    | Cal/Mol-Kelvin | Cal/Mol-Kelvin |
| Total | 170.327     | 70.811         | 150.921        |

C,0,-0.5702276817,1.1078811003,-1.6399474639  
 C,0,0.2216149835,1.4030908944,-0.4299546732  
 O,0,1.3612308575,1.9063962901,-0.656434015  
 C,0,1.7144152495,1.7899924761,-2.1235433674  
 C,0,0.5319788389,0.987091167,-2.7427372972  
 C,0,1.8951412738,3.1842792695,-2.6839477949  
 O,0,2.8820807589,3.8585623462,-1.9331995407  
 O,0,0.8364638352,-0.3240963127,-3.0676747514  
 N,0,-1.3349771296,-4.4672088351,1.2840523577  
 C,0,-0.8885277869,-5.3815918531,2.220035646  
 C,0,0.4274293543,-5.0642698638,2.4311151207  
 N,0,0.7855945298,-3.9870171198,1.6500447832  
 C,0,-0.2934531163,-3.6487684988,0.9699843972  
 H,0,-2.2641189349,-4.421357677,0.8926675047  
 H,0,2.6749442472,0.4285968071,1.8965918799  
 H,0,2.6431350802,1.2132411597,-2.0747683423  
 H,0,2.1850739844,3.0522581328,-3.7388648702  
 H,0,0.9313521393,3.7247201305,-2.6745565468  
 H,0,0.1980082614,1.4795913206,-3.6631086244  
 H,0,-1.2397037361,1.9642215326,-1.8207059944  
 H,0,-1.1743909984,0.2054454695,-1.5423067726  
 H,0,0.9946504658,-0.8157403405,-2.2067307708  
 H,0,3.0894510694,4.6924357444,-2.3812133122  
 O,0,0.8722327152,-1.2135709976,-0.5705856547

O,0,2.9926840348,-2.5119446729,0.7766604223  
 H,0,2.2510651856,-3.0518106728,1.1738399462  
 O,0,3.5382828231,-0.1344021552,-0.6078582492  
 O,0,1.8860179762,-0.0856487452,1.6547171685  
 H,0,-0.0589612879,1.3065320517,0.6153259891  
 As,0,2.3788154549,-0.9969519268,0.1818849471  
 H,0,-0.3343294439,-2.8287606525,0.2616528028  
 H,0,-1.5306239494,-6.1452771235,2.631430838  
 H,0,1.136365116,-5.5416328848,3.092705518

### Nuc 2.2 without Histidine B3LYP/6-31G\*

Andis22

E(RB+HF-LYP) = -2957.41754786

|                                              |          |
|----------------------------------------------|----------|
| Zero-point correction=                       | 0.178824 |
| (Hartree/Particle)                           |          |
| Thermal correction to Energy=                | 0.193640 |
| Thermal correction to Enthalpy=              | 0.194585 |
| Thermal correction to Gibbs Free Energy=     | 0.135927 |
| Sum of electronic and zero-point Energies=   | -        |
| 2957.238724                                  |          |
| Sum of electronic and thermal Energies=      | -        |
| 2957.223907                                  |          |
| Sum of electronic and thermal Enthalpies=    | -        |
| 2957.222963                                  |          |
| Sum of electronic and thermal Free Energies= | -        |
| 2957.281621                                  |          |

|       | E (Thermal) | CV             | S              |
|-------|-------------|----------------|----------------|
|       | KCal/Mol    | Cal/Mol-Kelvin | Cal/Mol-Kelvin |
| Total | 121.511     | 52.979         | 123.455        |

C,0,-0.3038121907,3.804218824,1.4144318138  
 C,0,-0.088479815,2.7536183271,0.3863327806  
 O,0,-1.1648732097,2.3880661977,-0.2167716218  
 C,0,-2.3799379056,2.8861720753,0.4946229256  
 C,0,-1.8540532676,3.8272286456,1.6183147094  
 C,0,-3.2788076571,3.5539895304,-0.5208492806  
 O,0,-3.684732626,2.5902007961,-1.4726426089  
 O,0,-2.2851027066,3.470410309,2.8917505253  
 O,0,-1.9662187758,0.8350966039,2.7008702855  
 As,0,-0.4381253556,0.2356502121,2.5213179758  
 O,0,0.2266998189,-0.1502541854,4.1064198304  
 O,0,-0.4133868563,-1.3901388574,1.8112040638  
 O,0,0.6944489323,1.1180691377,1.6321262824  
 H,0,0.0495807269,-1.2947912674,0.9613790515  
 H,0,-2.8338980451,1.9877309991,0.9138769754  
 H,0,-4.1298428815,3.9683710996,0.0435146879  
 H,0,-2.7461513103,4.3993395828,-0.989559464  
 H,0,-2.2192344201,4.8461219686,1.4438730565  
 H,0,0.0759444537,4.7547172066,1.0119245801  
 H,0,0.2373188714,3.5921710071,2.3371969607  
 H,0,-2.1422793376,2.4893317438,2.9985970352  
 H,0,-4.311400231,3.0090615881,-2.0816634698  
 H,0,0.7787659224,-0.9434630366,4.0022170974  
 H,0,0.8373788662,2.5398134921,-0.1318619193

### Nuc 2.3 without Histidine B3LYP/6-31G\*

Andis23

E(RB+HF-LYP) = -2957.41396619

|                                            |          |
|--------------------------------------------|----------|
| Zero-point correction=                     | 0.178482 |
| (Hartree/Particle)                         |          |
| Thermal correction to Energy=              | 0.193498 |
| Thermal correction to Enthalpy=            | 0.194442 |
| Thermal correction to Gibbs Free Energy=   | 0.134096 |
| Sum of electronic and zero-point Energies= | -        |
| 2957.235484                                |          |
| Sum of electronic and thermal Energies=    | -        |
| 2957.220469                                |          |

Sum of electronic and thermal Enthalpies= -  
2957.219524  
Sum of electronic and thermal Free Energies= -  
2957.279870

|       | E (Thermal)<br>KCal/Mol | CV<br>Cal/Mol-Kelvin | S<br>Cal/Mol-Kelvin |
|-------|-------------------------|----------------------|---------------------|
| Total | 121.422                 | 53.116               | 127.009             |

C,0,-0.3007240591,3.7441215575,1.4490466521  
C,0,-0.0931718223,2.7678252561,0.3520695802  
O,0,-1.1632462954,2.432053068,-0.2655906112  
C,0,-2.3818789872,2.8977888219,0.4686196307  
C,0,-1.8545497464,3.8000364313,1.6231904832  
C,0,-3.2895969317,3.5932804604,-0.5186879685  
O,0,-3.6952428733,2.6599998274,-1.5000171064  
O,0,-2.3212681264,3.4240377943,2.8773063137  
O,0,-1.981902577,0.8063977659,2.6059507037  
As,0,-0.4555518402,0.1846004558,2.4826664831  
O,0,0.1520659901,-0.0617598138,4.119770857  
O,0,-0.4542224548,-1.4774294347,1.8691081407  
O,0,0.7090597655,0.984111027,1.5623538746  
H,0,0.0268989596,-1.4345385619,1.0249923797  
H,0,-2.8214757235,1.9788677541,0.8585843877  
H,0,-4.1384042424,3.982703526,0.0663340572  
H,0,-2.7655030423,4.457885784,-0.9613639709  
H,0,-2.1915880074,4.8311323502,1.464285138  
H,0,0.1241625887,4.7091646199,1.136767436  
H,0,0.2139659471,3.4360358401,2.3604909699  
H,0,-2.1682508434,2.441795122,2.9724430061  
H,0,-4.3401442609,3.0899446711,-2.0816706524  
H,0,1.0115584689,-0.5110394609,4.0561975859  
H,0,0.8388111139,2.5337161382,-0.1462243701

### Nuc 2.4 without Histidine B3LYP/6-31G\*

Andis24

E(RB+HF-LYP) = -2957.41070550

Zero-point correction= 0.178405  
(Hartree/Particle)  
Thermal correction to Energy= 0.193366  
Thermal correction to Enthalpy= 0.194311  
Thermal correction to Gibbs Free Energy= 0.135067  
Sum of electronic and zero-point Energies= -  
2957.232300  
Sum of electronic and thermal Energies= -  
2957.217339  
Sum of electronic and thermal Enthalpies= -  
2957.216395  
Sum of electronic and thermal Free Energies= -  
2957.275638

|       | E (Thermal)<br>KCal/Mol | CV<br>Cal/Mol-Kelvin | S<br>Cal/Mol-Kelvin |
|-------|-------------------------|----------------------|---------------------|
| Total | 121.339                 | 53.201               | 124.689             |

C,0,-0.3122415509,3.7921619726,1.4109057814  
C,0,-0.1088420511,2.8205910401,0.3135142358  
O,0,-1.1774435283,2.4485421905,-0.2756867395  
C,0,-2.3959576047,2.9111939958,0.4668266667  
C,0,-1.8641645983,3.8252912424,1.6102216328  
C,0,-3.3161128024,3.5926172734,-0.5185892719  
O,0,-3.7150784761,2.6519823171,-1.4950860854  
O,0,-2.3022788182,3.4446046215,2.8716536423  
O,0,-1.9014034873,0.8468678709,2.5898545775  
As,0,-0.3757338678,0.2101169698,2.5036157291  
O,0,0.1924183622,-0.0968138466,4.1469415454  
O,0,-0.3767937943,-1.4610611955,1.9001067271  
O,0,0.7959257548,1.0111223823,1.6047223503

H,0,0.1457765916,-1.4342229806,1.0804347522  
H,0,-2.8191053485,1.9882188886,0.8651175872  
H,0,-4.1661584804,3.97393348,0.0700162918  
H,0,-2.804567712,4.4624429253,-0.9658584719  
H,0,-2.2197737924,4.8504083195,1.4527370811  
H,0,0.0996760405,4.7630642445,1.0993931338  
H,0,0.2225487894,3.4809790532,2.3106712399  
H,0,-2.1275548851,2.4643369801,2.964190619  
H,0,-4.3634111251,3.0740164418,-2.0787571377  
H,0,0.7259288708,-0.9084632535,4.1194289257  
H,0,0.8241485137,2.5588010668,-0.1697528127

### Nuc 2.5 without Histidine B3LYP/6-31G\*

E(RB+HF-LYP) = -2957.40809802

Zero-point correction= 0.178099  
(Hartree/Particle)  
Thermal correction to Energy= 0.193079  
Thermal correction to Enthalpy= 0.194024  
Thermal correction to Gibbs Free Energy= 0.134875  
Sum of electronic and zero-point Energies= -  
2957.229999  
Sum of electronic and thermal Energies= -  
2957.215019  
Sum of electronic and thermal Enthalpies= -  
2957.214074  
Sum of electronic and thermal Free Energies= -  
2957.273223

|       | E (Thermal)<br>KCal/Mol | CV<br>Cal/Mol-Kelvin | S<br>Cal/Mol-Kelvin |
|-------|-------------------------|----------------------|---------------------|
| Total | 121.159                 | 53.296               | 124.488             |

C,0,-0.3354116908,3.8081107111,1.3694653092  
C,0,-0.1540545076,2.8015911768,0.3039475918  
O,0,-1.2313175943,2.3946048758,-0.2368198072  
C,0,-2.4388849757,2.917908901,0.4889781672  
C,0,-1.8755207865,3.7912024381,1.6484611957  
C,0,-3.2967772447,3.6621795104,-0.5094149969  
O,0,-3.6991001504,2.7642066093,-1.5224576919  
O,0,-2.2267147026,3.3361765052,2.9110068074  
O,0,-1.9193903262,0.7592386582,2.4844577878  
As,0,-0.3965838085,0.1143173833,2.3732900384  
O,0,0.1983212397,-0.558286388,3.9077188626  
O,0,-0.5442823678,-1.38886213,1.4591659777  
O,0,0.853041893,1.0834767004,1.8151853211  
H,0,0.1567091706,-1.9847753199,1.7717896018  
H,0,-2.9187615482,2.0129293389,0.8621120433  
H,0,-4.1503319699,4.0638750485,0.0603841355  
H,0,-2.7360516998,4.5220569843,-0.9159117591  
H,0,-2.265355842,4.8120521523,1.5595192331  
H,0,0.0220571681,4.7806718435,0.9998831437  
H,0,0.2523834346,3.5433659979,2.2509000491  
H,0,-2.0668807122,2.3457525166,2.9311688445  
H,0,-4.3135238313,3.2247317459,-2.1136744248  
H,0,0.9742001785,-0.0183983267,4.1367036  
H,0,0.7720316741,2.4826040672,-0.1592360298

### Nuc 2.6 without Histidine B3LYP/6-31G\*

Andis26

E(RB+HF-LYP) = -2957.40489985

Zero-point correction= 0.177882  
(Hartree/Particle)  
Thermal correction to Energy= 0.192147  
Thermal correction to Enthalpy= 0.193091  
Thermal correction to Gibbs Free Energy= 0.135565  
Sum of electronic and zero-point Energies= -  
2957.227018

Sum of electronic and thermal Energies= -  
 2957.212753  
 Sum of electronic and thermal Enthalpies= -  
 2957.211809  
 Sum of electronic and thermal Free Energies= -  
 2957.269335

|       | E (Thermal) | CV             | S              |
|-------|-------------|----------------|----------------|
|       | KCal/Mol    | Cal/Mol-Kelvin | Cal/Mol-Kelvin |
| Total | 120.574     | 51.418         | 121.074        |

C,0,-0.3413352377,3.7526474863,1.3807986968  
 C,0,-0.1740247429,2.8123000212,0.2567166786  
 O,0,-1.2512332665,2.4408104879,-0.301633204  
 C,0,-2.45543979,2.9340759497,0.452292032  
 C,0,-1.8876331527,3.7954033524,1.6194883347  
 C,0,-3.3444622298,3.6766125379,-0.5180721019  
 O,0,-3.7640061241,2.7821829884,-1.5279419876  
 O,0,-2.2958558843,3.362770634,2.8726421744  
 O,0,-1.8019212861,0.8331467616,2.3822908449  
 As,0,-0.2783434988,0.1833446673,2.4793054727  
 O,0,0.1115629863,-0.0132972092,4.1931522332  
 O,0,-0.2541676002,-1.527039517,1.9931691767  
 O,0,0.9627057151,0.9256551803,1.6381706731  
 H,0,0.3560711715,-1.5634198478,1.2368396097  
 H,0,-2.9095536903,2.0142758345,0.8208689483  
 H,0,-4.1864015812,4.0643945096,0.0779386755  
 H,0,-2.8037738271,4.5454827276,-0.931921425  
 H,0,-2.2367799103,4.8292063607,1.5135529931  
 H,0,0.0822246023,4.7268449431,1.0959715476  
 H,0,0.2153196248,3.3969041823,2.2522476091  
 H,0,-2.0969803071,2.381498203,2.9155653939  
 H,0,-4.4025553921,3.2393609515,-2.0957713514  
 H,0,0.6642798836,-0.8082585402,4.2730104594  
 H,0,0.7521045376,2.4858293352,-0.2020594838

O,0,1.0004635971,1.0324727019,1.8975076102  
 H,0,0.1955974537,-2.0130243286,1.8400274341  
 H,0,-2.9389698217,2.0252369537,0.8317391307  
 H,0,-4.1778724307,4.0898553859,0.0700904442  
 H,0,-2.773357844,4.5607510791,-0.9135668863  
 H,0,-2.2577890986,4.819182026,1.5541949398  
 H,0,0.0519250121,4.7549569263,1.0491127567  
 H,0,0.2336943136,3.4382918269,2.2233196988  
 H,0,-2.048089118,2.3399579645,2.901451747  
 H,0,-4.3721766195,3.276258977,-2.1077261958  
 H,0,0.9346692425,-0.0639763238,4.2287444094  
 H,0,0.7396075401,2.458768271,-0.1837645906

## Nuc 2.7 without Histidine B3LYP/6-31G\*

Andis27

E(RB+HF-LYP) = -2957.40287086

Zero-point correction= 0.177792  
 (Hartree/Particle)  
 Thermal correction to Energy= 0.192892  
 Thermal correction to Enthalpy= 0.193836  
 Thermal correction to Gibbs Free Energy= 0.134027  
 Sum of electronic and zero-point Energies= -  
 2957.225078  
 Sum of electronic and thermal Energies= -  
 2957.209979  
 Sum of electronic and thermal Enthalpies= -  
 2957.209035  
 Sum of electronic and thermal Free Energies= -  
 2957.268844

|       | E (Thermal) | CV             | S              |
|-------|-------------|----------------|----------------|
|       | KCal/Mol    | Cal/Mol-Kelvin | Cal/Mol-Kelvin |
| Total | 121.042     | 53.382         | 125.880        |

C,0,-0.3462170736,3.7780916942,1.3601054855  
 C,0,-0.1859856023,2.8170845294,0.2551011677  
 O,0,-1.2631328814,2.4165418756,-0.2776839447  
 C,0,-2.4668643727,2.9376846487,0.4674528333  
 C,0,-1.8873830763,3.7904058335,1.634986091  
 C,0,-3.3307021056,3.6953647615,-0.5142416993  
 O,0,-3.743071211,2.8116766498,-1.535389556  
 O,0,-2.2499356717,3.3264877773,2.888940351  
 O,0,-1.8183583677,0.8099464604,2.374990213  
 As,0,-0.3097854643,0.1158495151,2.3827124134  
 O,0,0.13420322,-0.5522073242,3.9705430647  
 O,0,-0.4606686202,-1.3949268812,1.477976082
